# Supplementary material
Source: Springer Nature journal article supplement (https://www.springermedizin.de/resource/supplementary/13058_2013_3279_MOESM8_ESM.pdf/9703854)
Supplement: MOESM8 [file 9703854]

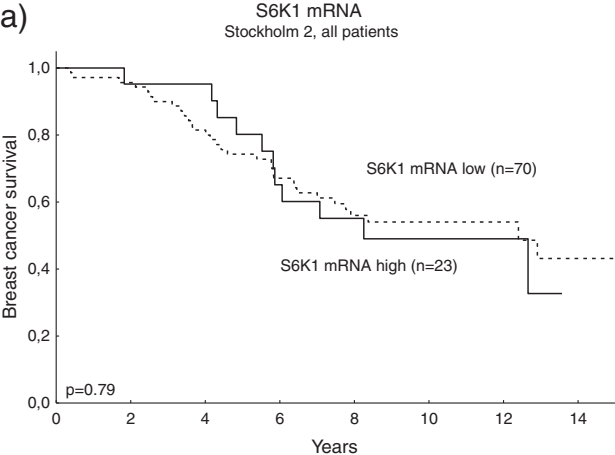

S6K1  
BCS: HR (95%CI)=1.31 (0.63-2.72),  $P=0.48$   
DRFS: HR (95%CI)=1.01 (0.48-2.13),  $P=0.98$

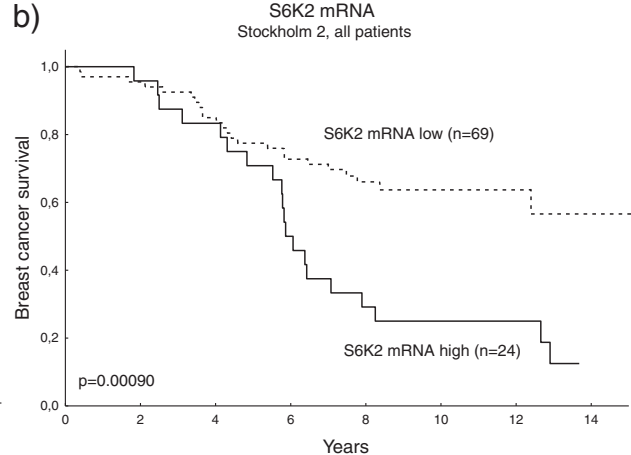

S6K2  
BCS: HR (95%CI)=2.97 (1.61-5.48),  $P=0.00051$   
DRFS: HR (95%CI)=2.67 (1.45-4.90),  $P=0.0016$

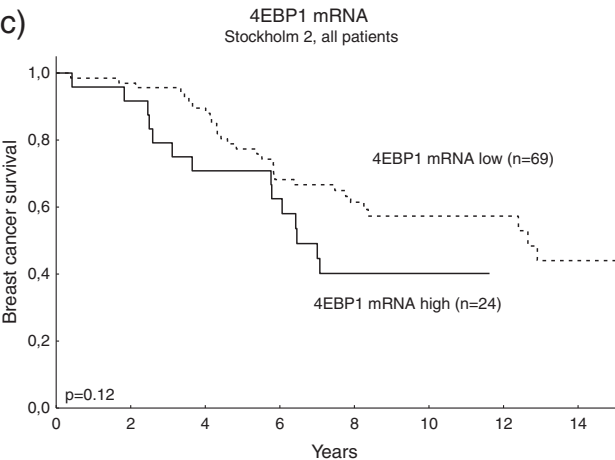

4EBP1  
BCS: HR (95%CI)=2.16 (1.07-4.38),  $P=0.033$   
DRFS: HR (95%CI)=1.61 (0.80-3.25),  $P=0.18$

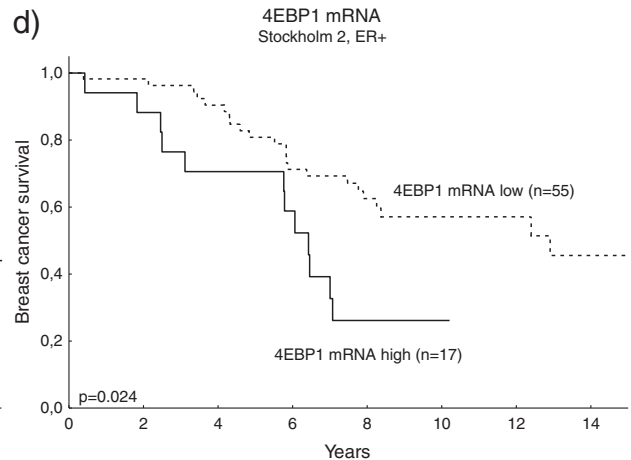

4EBP1 (ER+)  
BCS: HR (95%CI)=3.41 (1.52-7.65),  $P=0.0028$   
DRFS: HR (95%CI)=2.61 (1.17-5.80),  $P=0.019$
